# Supplementary material for: Tibanna: software for scalable execution of portable pipelines on the cloud
Source: Oxford University Press journal article supplement (doi:10.1093/bioinformatics/btz379), 2019-04-30
Supplement: bioinformatics_35_21_4424_s2.pdf [file bioinformatics_35_21_4424_s2.pdf]

## Supplementary Table 1. Comparison of cloud-friendly pipeline executors

Cloud-friendly pipeline executors are compared in various aspects, focused on compatibility with portable languages and degree of support for AWS cloud.

|                                                                    | Tibanna    | Seven Bridges | DNA Nexus  | Nextflow                | Toil    | Arvados | Cromwell     | Snakemake |
|--------------------------------------------------------------------|------------|---------------|------------|-------------------------|---------|---------|--------------|-----------|
| <b>Common Workflow Language (CWL) support</b>                      | yes        | yes           | no         | no                      | yes     | yes     | yes          | yes       |
| <b>Workflow Description Language (WDL) support</b>                 | yes        | no            | yes        | no                      | yes     | no      | yes          | no        |
| <b>computing on Amazon Web Services (AWS)</b>                      | yes        | yes           | yes        | yes                     | yes     | yes     | yes          | no        |
| <b>computing on Google Cloud Platform (GCP)</b>                    | no         | yes           | no         | yes                     | yes     | yes     | yes          | yes       |
| <b>easy to integrate with user's own cloud data storage system</b> | yes        | moderate      | no         | yes                     | yes     | no      | yes          | yes       |
| <b>free and open source</b>                                        | yes        | no            | no         | yes                     | yes     | yes     | yes          | yes       |
| <b>Graphic User Interface (GUI)</b>                                | via AWS    | yes           | yes        | no                      | no      | yes     | no           | no        |
| <b>Command-line interface (CLI)</b>                                | yes        | yes           | yes        | yes                     | yes     | yes     | yes          | yes       |
| <b>Python Application Programming Interface (API)</b>              | yes        | yes           | yes        | no                      | yes     | yes     | no           | yes       |
| <b>easy setup on AWS cloud</b>                                     | yes        | yes           | yes        | no                      | no      | no      | no           | -         |
| <b>cloud resource allocation approach on AWS</b>                   | individual | individual    | individual | cluster<br>AWS<br>Batch | cluster | cluster | AWS<br>Batch | -         |
| <b>master server required</b>                                      | no         | no            | no         | yes                     | yes     | yes     | no           | no        |
| <b>Comes with its own portal service</b>                           | no         | yes           | yes        | no                      | no      | yes     | no           | no        |
